# Supplementary material for: “Generalist” Aphid Parasitoids Behave as Specialists at the Agroecosystem Scale
Source: Insects. 2019 Dec 19;11(1):6. doi: 10.3390/insects11010006 (PMC7023390; doi:10.3390/insects11010006)
Supplement: Supplementary file 2 [file insects-11-00006-s002.xlsx]

## Sheet: parasitism_data
Parasitoid species	Month	Season samplig	Type of areas	Plant familly	Plant species	Aphid species	Aphid number	Parasitoid number	Month of presence	Number of samples	Potential host range	Realized host range	Realized host range after ML tree
Aphidius avenae	June	Before harvest	uncultivated	Chenopodiaceae	Chenopodium sp.	Aphis fabae	80	3	4	16	9	4	4
Aphidius avenae	May	Before harvest	Cultivated	Poaceae	Hordeum vulgare	Metopolophium dirhodum	2	1	4	16	9	4	4
Aphidius avenae	April	Before harvest	Cultivated	Fabaceae	Pisum sativum	Acyrthosiphon pisum	NA	1	4	16	9	4	4
Aphidius avenae	July	Before harvest	Cultivated	Solanaceae	Solanum tuberosum	Aulacorthum solani	NA	1	4	16	9	4	4
Aphidius avenae	June	Before harvest	Cultivated	Poaceae	Triticum aestivum	Sitobion avenae	150	1	4	16	9	4	4
Aphidius avenae	June	Before harvest	Cultivated	Poaceae	Triticum aestivum	Sitobion avenae	90	3	4	16	9	4	4
Aphidius avenae	May	Before harvest	Cultivated	Poaceae	Triticum aestivum	Sitobion avenae	1	2	4	16	9	4	4
Aphidius avenae	July	Before harvest	Cultivated	Poaceae	Zea mays	Sitobion avenae	20	3	4	16	9	4	4
Aphidius avenae	July	Before harvest	Cultivated	Poaceae	Zea mays	Sitobion avenae	10	2	4	16	9	4	4
Aphidius avenae	July	Before harvest	Cultivated	Poaceae	Zea mays	Sitobion avenae	20	3	4	16	9	4	4
Aphidius avenae	July	Before harvest	Cultivated	Poaceae	Zea mays	Sitobion avenae	20	3	4	16	9	4	4
Aphidius avenae	July	Before harvest	Cultivated	Poaceae	Zea mays	Sitobion avenae	4	7	4	16	9	4	4
Aphidius avenae	July	Before harvest	Cultivated	Poaceae	Zea mays	Sitobion avenae	10	4	4	16	9	4	4
Aphidius avenae	July	Before harvest	Cultivated	Poaceae	Zea mays	Sitobion avenae	30	5	4	16	9	4	4
Aphidius avenae	July	Before harvest	Cultivated	Poaceae	Zea mays	Sitobion avenae	15	5	4	16	9	4	4
Aphidius avenae	July	Before harvest	Cultivated	Poaceae	Zea mays	Sitobion avenae	20	6	4	16	9	4	4
Aphidius ervi	June	Before harvest	uncultivated	Asteraceae	Anthriscus sylvestris	Cavariella aegopodii	120	1	5	12	17	5	5
Aphidius ervi	June	Before harvest	Cultivated	Brassicaceae	Brassica rapa	Myzus persicae	90	1	5	12	17	5	5
Aphidius ervi	April	Before harvest	Cultivated	Fabaceae	Medicago sativa	Acyrthosiphon pisum	40	9	5	12	17	5	5
Aphidius ervi	June	Before harvest	Cultivated	Fabaceae	Medicago sativa	Acyrthosiphon pisum	NA	4	5	12	17	5	5
Aphidius ervi	May	Before harvest	Cultivated	Fabaceae	Medicago sativa	Acyrthosiphon pisum	NA	5	5	12	17	5	5
Aphidius ervi	September	After harvest	Cultivated	Fabaceae	Medicago sativa	Acyrthosiphon pisum	150	2	5	12	17	5	5
Aphidius ervi	April	Before harvest	Cultivated	Fabaceae	Pisum sativum	Acyrthosiphon pisum	NA	4	5	12	17	5	5
Aphidius ervi	April	Before harvest	Cultivated	Fabaceae	Trifolium sp.	Acyrthosiphon pisum	NA	1	5	12	17	5	5
Aphidius ervi	April	Before harvest	Cultivated	Fabaceae	Trifolium sp.	Acyrthosiphon pisum	NA	3	5	12	17	5	5
Aphidius ervi	October	After harvest	Cultivated	Fabaceae	Trifolium sp.	Acyrthosiphon pisum	NA	8	5	12	17	5	5
Aphidius ervi	April	Before harvest	uncultivated	Urticaceae	Urtica dioica	Microlophium carnosum	NA	1	5	12	17	5	5
Aphidius ervi	June	Before harvest	uncultivated	Asteraceae	Picris hieracioides	Hyperomyzus picridis	40	1	5	12	17	5	5
Aphidius matricariae	July	Before harvest	Cultivated	Brassicaceae	Brassica napus	Brevicoryne brassicae	250	1	4	11	13	8	1
Aphidius matricariae	May	Before harvest	Cultivated	Brassicaceae	Brassica oleracea	Myzus persicae	10	1	4	11	13	8	5
Aphidius matricariae	October	After harvest	Cultivated	Brassicaceae	Brassica rapa	Myzus persicae	3	2	4	11	13	8	5
Aphidius matricariae	June	Before harvest	Cultivated	Brassicaceae	Brassica rapa	Brevicoryne brassicae	200	4	4	11	13	8	1
Aphidius matricariae	June	Before harvest	uncultivated	Chenopodiaceae	Chenopodium sp.	Aphis fabae	80	1	4	11	13	8	2
Aphidius matricariae	June	Before harvest	uncultivated	Chenopodiaceae	Chenopodium sp.	Myzus persicae	36	1	4	11	13	8	5
Aphidius matricariae	June	Before harvest	uncultivated	Asteraceae	Achillea millefolium	Uroleucon sp.	100	5	4	11	13	8	5
Aphidius matricariae	June	Before harvest	uncultivated	Asteraceae	Matricaria sp.	Aphis sp.	70	1	4	11	13	8	2
Aphidius matricariae	June	Before harvest	uncultivated	Asteraceae	Matricaria sp.	Brachycaudus helichrysi	250	4	4	11	13	8	5
Aphidius matricariae	June	Before harvest	uncultivated	Asteraceae	Picris hieracioides	Hyperomyzus picridis	60	2	4	11	13	8	5
Aphidius matricariae	June	Before harvest	uncultivated	Rosaceae	Prunus avium	Myzus cerasi	70	1	4	11	13	8	5
Aphidius sonchi	June	Before harvest	uncultivated	Asteraceae	Picris hieracioides	Hyperomyzus picridis	120	86	2	6	3	6	6
Aphidius sonchi	June	Before harvest	uncultivated	Asteraceae	Sonchus sp.	Aphis fabae	250	2	2	6	3	6	6
Aphidius sonchi	May	Before harvest	uncultivated	Cornaceae	Cornus sanguinea	Cavariella pastinaceae	2	1	2	6	3	6	6
Aphidius sonchi	June	Before harvest	uncultivated	Asteraceae	Sonchus sp.	Hyperomyzus lactucae	900	1	2	6	3	6	6
Aphidius sonchi	June	Before harvest	uncultivated	Asteraceae	Sonchus sp.	Hyperomyzus sp.	100	1	2	6	3	6	6
Aphidius sonchi	June	Before harvest	uncultivated	Asteraceae	Sonchus sp.	Uroleucon sp.	120	1	2	6	3	6	6
Aphidius urticae	April	Before harvest	Cultivated	Fabaceae	Medicago sativa	Acyrthosiphon pisum	40	1	1	1	8	1	1
Binodoxys angelicae	June	Before harvest	uncultivated	Asteraceae	Cirsium sp.	Aphis fabae	400	11	4	18	12	5	5
Binodoxys angelicae	June	Before harvest	uncultivated	Asteraceae	Cirsium sp.	Aphis fabae	150	11	4	18	12	5	5
Binodoxys angelicae	July	Before harvest	uncultivated	Asteraceae	Cirsium sp.	Aphis sp.	120	1	4	18	12	5	5
Binodoxys angelicae	June	Before harvest	uncultivated	Asteraceae	Matricaria sp.	Aphis sp.	70	4	4	18	12	5	5
Binodoxys angelicae	May	Before harvest	uncultivated	Rubiaceae	Galium sp.	Aphis sp.	20	4	4	18	12	5	5
Binodoxys angelicae	July	Before harvest	uncultivated	Apiaceae	Heracleum sphondylium	Cavariella theobaldii	380	2	4	18	12	5	5
Binodoxys angelicae	June	Before harvest	uncultivated	Apiaceae	Heracleum sphondylium	Cavariella theobaldii	500	1	4	18	12	5	5
Binodoxys angelicae	June	Before harvest	uncultivated	Apiaceae	Heracleum sphondylium	Cavariella theobaldii	400	2	4	18	12	5	5
Binodoxys angelicae	June	Before harvest	uncultivated	Apiaceae	Heracleum sphondylium	Cavariella theobaldii	1200	1	4	18	12	5	5
Binodoxys angelicae	July	Before harvest	uncultivated	Apiaceae	Pastinaca sativa	Cavariella theobaldii	80	4	4	18	12	5	5
Binodoxys angelicae	September	After harvest	uncultivated	Apiaceae	Pastinaca sativa	Hyadaphis foeniculi	50	1	4	18	12	5	5
Binodoxys angelicae	July	Before harvest	uncultivated	Rosaceae	Rubus fruticosus	Aphis sp.	NA	3	4	18	12	5	5
Binodoxys angelicae	June	Before harvest	uncultivated	Rosaceae	Rubus fruticosus	Aphis sp.	80	1	4	18	12	5	5
Binodoxys angelicae	June	Before harvest	uncultivated	Polygonaceae	Rumex sp.	Aphis sp.	100	11	4	18	12	5	5
Binodoxys angelicae	July	Before harvest	uncultivated	Salicaceae	Salix caprea	Aphis farinosa	200	1	4	18	12	5	5
Binodoxys angelicae	June	Before harvest	uncultivated	Salicaceae	Salix caprea	Aphis farinosa	15	1	4	18	12	5	5
Binodoxys angelicae	June	Before harvest	uncultivated	Caprifoliaceae	Viburnum opulus	Aphis fabae	100	22	4	18	12	5	5
Binodoxys angelicae	June	Before harvest	uncultivated	Fabaceae	Vicia faba	Aphis sp.	180	4	4	18	12	5	5
Diaeretiella rapae	June	Before harvest	uncultivated	Brassicaceae	Barbarea vulgaris	Brevicoryne brassicae	60	3	4	19	21	5	4
Diaeretiella rapae	June	Before harvest	uncultivated	Brassicaceae	Brassica napus	Brevicoryne brassicae	2000	61	4	19	21	5	4
Diaeretiella rapae	June	Before harvest	Cultivated	Brassicaceae	Brassica napus	Brevicoryne brassicae	800	36	4	19	21	5	4
Diaeretiella rapae	June	Before harvest	Cultivated	Brassicaceae	Brassica napus	Brevicoryne brassicae	90	48	4	19	21	5	4
Diaeretiella rapae	June	Before harvest	Cultivated	Brassicaceae	Brassica napus	Brevicoryne brassicae	300	20	4	19	21	5	4
Diaeretiella rapae	May	Before harvest	Cultivated	Brassicaceae	Brassica napus	Brevicoryne brassicae	30	40	4	19	21	5	4
Diaeretiella rapae	May	Before harvest	Cultivated	Brassicaceae	Brassica napus	Brevicoryne brassicae	2800	38	4	19	21	5	4
Diaeretiella rapae	June	Before harvest	Cultivated	Brassicaceae	Brassica oleracea	Brevicoryne brassicae	80	13	4	19	21	5	4
Diaeretiella rapae	May	Before harvest	Cultivated	Brassicaceae	Brassica oleracea	Brevicoryne brassicae	250	25	4	19	21	5	4
Diaeretiella rapae	June	Before harvest	Cultivated	Brassicaceae	Brassica oleracea	Myzus persicae	4	10	4	19	21	5	4
Diaeretiella rapae	May	Before harvest	Cultivated	Brassicaceae	Brassica oleracea	Myzus persicae	10	3	4	19	21	5	4
Diaeretiella rapae	May	Before harvest	Cultivated	Brassicaceae	Brassica oleracea	Myzus persicae	20	11	4	19	21	5	4
Diaeretiella rapae	June	Before harvest	uncultivated	Chenopodiaceae	Chenopodium sp.	Aphis fabae	200	1	4	19	21	5	4
Diaeretiella rapae	October	After harvest	uncultivated	Chenopodiaceae	Chenopodium sp.	Hayhurstia atriplicis	36	9	4	19	21	5	1
Diaeretiella rapae	September	After harvest	uncultivated	Chenopodiaceae	Chenopodium sp.	Hayhurstia atriplicis	50	1	4	19	21	5	1
Diaeretiella rapae	September	After harvest	uncultivated	Chenopodiaceae	Chenopodium sp.	Hayhurstia atriplicis	15	1	4	19	21	5	1
Diaeretiella rapae	June	Before harvest	uncultivated	Chenopodiaceae	Chenopodium sp.	Myzus persicae	40	5	4	19	21	5	4
Diaeretiella rapae	June	Before harvest	uncultivated	Asteraceae	Cirsium sp.	Aphis fabae	400	1	4	19	21	5	4
Diaeretiella rapae	June	Before harvest	uncultivated	Asteraceae	Crepis sp.	Uroleucon sp.	60	4	4	19	21	5	4
Ephedrus plagiator	October	After harvest	uncultivated	Brassicaceae	Capsella bursa-pastoris	Aphis sp.	15	2	3	10	18	4	2
Ephedrus plagiator	June	Before harvest	uncultivated	Chenopodiaceae	Chenopodium sp.	Aphis fabae	80	2	3	10	18	4	2
Ephedrus plagiator	October	After harvest	uncultivated	Chenopodiaceae	Chenopodium sp.	Aphis fabae	100	1	3	10	18	4	2
Ephedrus plagiator	November	After harvest	uncultivated	Asteraceae	Picris hieracioides	Uroleucon sp.	150	1	3	10	18	4	2
Ephedrus plagiator	November	After harvest	uncultivated	Asteraceae	Picris hieracioides	Uroleucon sp.	150	1	3	10	18	4	2
Ephedrus plagiator	October	After harvest	uncultivated	Asteraceae	Picris hieracioides	Uroleucon sp.	800	1	3	10	18	4	2
Ephedrus plagiator	October	After harvest	uncultivated	Asteraceae	Picris hieracioides	Uroleucon sp.	150	3	3	10	18	4	2
Ephedrus plagiator	October	After harvest	uncultivated	Asteraceae	Picris hieracioides	Uroleucon sp.	200	9	3	10	18	4	2
Ephedrus plagiator	October	After harvest	uncultivated	Asteraceae	Sonchus sp.	Uroleucon sp.	20	2	3	10	18	4	2
Ephedrus plagiator	June	Before harvest	Cultivated	Poaceae	Triticum aestivum	Sitobion avenae	150	2	3	10	18	4	2
Lysiphlebus fabarum	June	Before harvest	uncultivated	Brassicaceae	Capsella bursa-pastoris	Aphis sp.	35	3	3	23	13	6	3
Lysiphlebus fabarum	June	Before harvest	uncultivated	Fabaceae	Cytisus scoparius	Aphis sp.	100	27	3	23	13	6	4
Lysiphlebus fabarum	June	Before harvest	uncultivated	Apiaceae	Heracleum sphondylium	Aphis fabae	200	1	3	23	13	6	NA
Lysiphlebus fabarum	July	Before harvest	uncultivated	Apiaceae	Heracleum sphondylium	Aphis sp.	700	6	3	23	13	6	NA
Lysiphlebus fabarum	July	Before harvest	uncultivated	Asteraceae	Cirsium sp.	Aphis fabae	100	4	3	23	13	6	3
Lysiphlebus fabarum	June	Before harvest	uncultivated	Asteraceae	Cirsium sp.	Aphis fabae	150	57	3	23	13	6	3
lysiphlebus fabarum	June	Before harvest	uncultivated	Asteraceae	Cirsium sp.	Aphis fabae	400	4	3	23	13	6	3
Lysiphlebus fabarum	June	Before harvest	uncultivated	Rosaceae	Rubus fruticosus	Aphis sp.	80	70	3	23	13	6	3
Lysiphlebus fabarum	June	Before harvest	uncultivated	Rosaceae	Rubus fruticosus	Metopolophium sp.	100	1	3	23	13	6	3
Lysiphlebus fabarum	June	Before harvest	uncultivated	Polygonaceae	Rumex sp.	Aphis sp.	100	57	3	23	13	6	3
Lysiphlebus fabarum	July	Before harvest	uncultivated	Asteraceae	Cirsium sp.	Aphis sp.	120	1	3	23	13	6	4
Lysiphlebus fabarum	July	Before harvest	uncultivated	Asteraceae	Cirsium sp.	Aphis sp.	70	2	3	23	13	6	4
Lysiphlebus fabarum	July	Before harvest	uncultivated	Asteraceae	Cirsium sp.	Aphis sp.	180	6	3	23	13	6	4
Lysiphlebus fabarum	June	Before harvest	uncultivated	Asteraceae	Cirsium sp.	Brachycaudus sp.	150	20	3	23	13	6	4
Lysiphlebus fabarum	June	Before harvest	uncultivated	Asteraceae	Matricaria sp.	Aphis sp.	70	60	3	23	13	6	3
Lysiphlebus fabarum	June	Before harvest	uncultivated	Asteraceae	Matricaria sp.	Brachycaudus sp.	70	56	3	23	13	6	3
Lysiphlebus fabarum	July	Before harvest	uncultivated	Asteraceae	Senecio sp.	Brachycaudus cardui	150	36	3	23	13	6	4
Lysiphlebus fabarum	June	Before harvest	uncultivated	Asteraceae	Sonchus sp.	Aphis sp.	80	22	3	23	13	6	3
Lysiphlebus fabarum	July	Before harvest	uncultivated	Fabaceae	Ulex europaeus	Aphis sp.	100	131	3	23	13	6	4
Lysiphlebus fabarum	June	Before harvest	uncultivated	Urticaceae	Urtica dioica	Aphis sp.	200	118	3	23	13	6	3
Lysiphlebus fabarum	June	Before harvest	uncultivated	Fabaceae	Vicia faba	Aphis sp.	180	11	3	23	13	6	4
Lysiphlebus fabarum	June	Before harvest	uncultivated	Fabaceae	Vicia sp.	Aphis sp.	20	2	3	23	13	6	4
Lysiphlebus fabarum	July	Before harvest	Cultivated	Poaceae	Zea mays	Sitobion avenae	4	1	3	23	13	6	4
Adialytus salicaphis	July	Before harvest	uncultivated	Salicaceae	Populus deltoides	Chaitophorus leucomelas	150	1	2	2	4	2	2
Adialytus salicaphis	June	Before harvest	uncultivated	Salicaceae	Populus deltoides	Chaitophorus sp.	250	35	2	2	4	2	2
Aphidius absinthii	June	Before harvest	uncultivated	Asteraceae	Achillea millefolium	Macrosiphoniella sp.	250	1	1	1	2	1	1
Aphidius eadyi	April	Before harvest	Cultivated	Fabaceae	Medicago sativa	Acyrthosiphon pisum	40	1	1	1	1	1	1
Aphidius funebris	July	Before harvest	uncultivated	Asteraceae	Aster sp.	Uromelan sp.	150	1	4	15	2	3	3
Aphidius funebris	July	Before harvest	uncultivated	Asteraceae	Centaurea sp.	Uromelan sp.	150	1	4	15	2	3	3
Aphidius funebris	June	Before harvest	uncultivated	Asteraceae	Centaurea sp.	Uromelan sp.	40	1	4	15	2	3	3
Aphidius funebris	June	Before harvest	uncultivated	Asteraceae	Centaurea sp.	Uromelan sp.	80	1	4	15	2	3	3
Aphidius funebris	July	Before harvest	uncultivated	Asteraceae	Crepis sp.	Uroleucon sp.	600	1	4	15	2	3	3
Aphidius funebris	June	Before harvest	uncultivated	Asteraceae	Crepis sp.	Uroleucon sp.	150	1	4	15	2	3	3
Aphidius funebris	September	After harvest	uncultivated	Asteraceae	Picris hieracioides	Uroleucon sp.	100	5	4	15	2	3	3
Aphidius funebris	June	Before harvest	uncultivated	Asteraceae	Senecio sp.	Uroleucon sp.	300	1	4	15	2	3	3
Aphidius funebris	June	Before harvest	uncultivated	Asteraceae	Sonchus sp.	Uroleucon sonchi	30	2	4	15	2	3	3
Aphidius funebris	June	Before harvest	uncultivated	Asteraceae	Sonchus sp.	Uroleucon sp.	1930	2	4	15	2	3	3
Aphidius funebris	June	Before harvest	uncultivated	Asteraceae	Sonchus sp.	Uroleucon sp.	200	3	4	15	2	3	3
Aphidius funebris	June	Before harvest	uncultivated	Asteraceae	Sonchus sp.	Uroleucon sp.	61	1	4	15	2	3	3
Aphidius funebris	June	Before harvest	uncultivated	Asteraceae	Sonchus sp.	Uroleucon sp.	797	6	4	15	2	3	3
Aphidius funebris	June	Before harvest	uncultivated	Asteraceae	Sonchus sp.	Uroleucon sp.	170	6	4	15	2	3	3
Aphidius funebris	October	After harvest	uncultivated	Asteraceae	Sonchus sp.	Uroleucon sp.	70	4	4	15	2	3	3
Aphidius rhopalosiphii	April	Before harvest	Cultivated	Poaceae	Hordeum vulgare	Metopolophium dirhodum	80	4	2	3	2	2	2
Aphidius rhopalosiphii	May	Before harvest	Cultivated	Poaceae	Triticum aestivum	Sitobion avenae	1	1	2	3	2	2	2
Aphidius rosae	June	Before harvest	uncultivated	Rosaceae	Rubus fruticosus	Macrosiphum funestum	60	1	1	1	2	1	1
Aphidius salicis	June	Before harvest	uncultivated	Asteraceae	Anthriscus sylvestris	Cavariella aegopodii	120	14	1	2	5	2	2
Aphidius salicis	June	Before harvest	uncultivated	Apiaceae	Heracleum sphondylium	Cavariella sp.	1	8	1	2	5	2	2
Aphiduis rhopalosiphii	June	Before harvest	uncultivated	Asteraceae	Crepis sp.	Cavariella sp.	835	1	2	3	2	2	2
Binodoxys acalephae	July	Before harvest	uncultivated	Asteraceae	Achillea millefolium	Macrosiphoniella sp.	450	4	2	5	3	4	4
Binodoxys acalephae	June	Before harvest	uncultivated	Asteraceae	Anthriscus sylvestris	Cavariella aegopodii	120	2	2	5	3	4	4
Binodoxys acalephae	June	Before harvest	uncultivated	Asteraceae	Sonchus sp.	Uroleucon sp.	797	12	2	5	3	4	4
Binodoxys acalephae	June	Before harvest	uncultivated	Polygonaceae	Rumex sp.	Aphis sp.	180	1	2	5	3	4	4
Binodoxys acalephae	July	Before harvest	uncultivated	Fabaceae	Ulex europaeus	Aphis sp.	100	1	2	5	3	4	4
Binodoxys centaurea	July	Before harvest	uncultivated	Asteraceae	Aster sp.	Uromelan sp.	150	6	2	7	4	3	3
Binodoxys centaurea	June	Before harvest	uncultivated	Asteraceae	Centaurea sp.	Uromelan sp.	15	5	2	7	4	3	3
Binodoxys centaurea	July	Before harvest	uncultivated	Asteraceae	Crepis sp.	Uroleucon sp.	600	3	2	7	4	3	3
Binodoxys centaurea	June	Before harvest	uncultivated	Asteraceae	Crepis sp.	Uroleucon sp.	150	5	2	7	4	3	3
Binodoxys centaurea	June	Before harvest	uncultivated	Asteraceae	Crepis sp.	Uroleucon sp.	250	13	2	7	4	3	3
Binodoxys centaurea	June	Before harvest	uncultivated	Asteraceae	Senecio sp.	Uroleucon sp.	300	3	2	7	4	3	3
Binodoxys centaurea	June	Before harvest	uncultivated	Solanaceae	Solanum nigrum	Aphis sp.	120	1	2	7	4	3	3
Ephedrus nacheri	October	After harvest	uncultivated	Chenopodiaceae	Chenopodium sp.	Hayhurstia atriplicis	40	1	2	3	3	1	1
Ephedrus nacheri	September	After harvest	uncultivated	Chenopodiaceae	Chenopodium sp.	Hayhurstia atriplicis	50	3	2	3	3	1	1
Ephedrus nacheri	September	After harvest	uncultivated	Chenopodiaceae	Chenopodium sp.	Hayhurstia atriplicis	15	2	2	3	3	1	1
Ephedrus niger	July	Before harvest	uncultivated	Asteraceae	Picris hieracioides	Uroleucon sp.	650	2	1	1	4	1	1
Lysiphlebus confusus	June	Before harvest	uncultivated	Salicaceae	Salix caprea	Aphis sp.	150	5	1	1	7	1	1
Lysiphlebus testraceïpes	June	Before harvest	uncultivated	Salicaceae	Salix caprea	Macrosiphum sp.	10	19	1	1	5	1	1
Monoctonus crepidis	June	Before harvest	uncultivated	Asteraceae	Crepis sp.	Uroleucon sp.	897	12	1	2	1	1	1
Monoctonus crepidis	June	Before harvest	uncultivated	Asteraceae	Crepis sp.	Uroleucon sp.	835	7	1	2	1	1	1
Praon barbatum	June	Before harvest	Cultivated	Fabaceae	Medicago sativa	Acyrthosiphon pisum	NA	1	2	2	1	1	1
Praon barbatum	September	After harvest	Cultivated	Fabaceae	Medicago sativa	Acyrthosiphon pisum	150	1	2	2	1	1	1
Praon sp.	July	Before harvest	uncultivated	Asteraceae	Picris hieracioides	Uroleucon sp.	650	7	1	1	NA	1	1
Praon uroleucon	July	Before harvest	uncultivated	Asteraceae	Cirsium sp.	Uroleucon sp.	700	1	2	2	1	1	1
Praon uroleucon	June	Before harvest	uncultivated	Asteraceae	Crepis sp.	Uroleucon sp.	250	1	2	2	1	1	1
Praon volucre	July	Before harvest	uncultivated	Asteraceae	Crepis sp.	Uroleucon sp.	3	1	2	3	23	2	2
Praon volucre	June	Before harvest	uncultivated	Asteraceae	Crepis sp.	Uroleucon sp.	150	3	2	3	23	2	2
Praon volucre	June	Before harvest	uncultivated	Fabaceae	Ulex europaeus	Aphis sp.	100	5	2	3	23	2	2
Praon yomenae	June	Before harvest	uncultivated	Asteraceae	Achillea millefolium	Uroleucon sp.	100	1	1	2	4	1	1
Praon yomenae	June	Before harvest	uncultivated	Asteraceae	Crepis sp.	Uroleucon sp.	150	3	1	2	4	1	1
Trioxys auctus	July	Before harvest	Cultivated	Poaceae	Zea mays	Sitobion avenae	20	1	1	1	1	1	1

## Sheet: host_range
Parasitoids species	Hosts not described in the literature	Main host (number of samples)	Presence in the agroecosystem	Month(s) of presence	Number of samples	Number of individuals	Potential host range	Realized host range
Adialytus salicaphis		Chaitophorus leucomelas (2)	June, July	2	2	36	4	2
Aphidius absinthii		Macrosiphoniella sp. (1)	June	1	1	1	2	1
Aphidius avenae	Aphis fabae	Sitobion avenae (12)	April to July	4	16	50	9	4
Aphidius eadyi		Acyrthosiphon pisum (1)	Avril	1	1	1	1	1
Aphidius ervi	Cavariella aegopodii and Hyperomyzus picridis	Acyrthosiphon pisum (8)	April to June, September, October	5	12	40	17	5
Aphidius funebris	Uroleucon sp. (Uromelan sp.)	Uroleucon sp. (10)	June, July, September, October	4	15	36	2	3
Aphidius matricariae	Hyperomyzus picridis and Uroleucon sp.	Myzus persicae (3)	May to July, October	4	11	23	13	8
Aphidius rhopalosiphi		Sitobion avenae (2)	April, May	2	3	5	2	2
Aphidius rosae		Macrosiphum funestum (1)	June	1	1	1	2	1
Aphidius salicis		Cavariella aegopodii (1)	June	1	2	22	5	2
Aphidius sonchi	Aphis fabae, Cavariella pastinaceae and Uroleucon sp.	Hyperomyzus picridis (2)	Mai, June	2	6	92	3	6
Aphidius urticae		Acyrthosiphon pisum (1)	April	1	1	1	8	1
Binodoxys acalephae	Cavariella aegopodii , Macrosiphoniella sp and Uroleucon sp.	Aphis sp. (2)	June, July	2	5	20	3	4
Binodoxys angelicae	Cavariella theobaldii and Hyadaphis foeniculi	Aphis sp. (7)	May at July, September	4	18	75	12	5
Binodoxys centaureae	Aphis sp. and Uroleucon sp. (Uromelan sp.)	Uroleucon sp. (4)	June, July	2	7	36	4	3
Diaeretiella rapae		Brevicoryne brassicae (9)	May, June, September, October	4	19	320	21	5
Ephedrus nacheri		Hayhurstia atriplicis (3)	September, October	2	3	6	3	1
Ephedrus niger		Uroleucon sp. (1)	July	1	1	2	4	1
Ephedrus plagiator	Uroleucon sp.	Uroleucon sp. (6)	June, October, November	3	10	24	18	4
Lysiphlebus confusus		Aphis sp. (1)	June	1	1	5	7	1
Lysiphlebus fabarum	Metopolophium sp.	Aphis sp. (14)	June, July, October	3	23	696	13	6
Lysiphlebus testraceipes	Macrosiphum sp.	Macrosiphum sp. (1)	June	1	1	19	5	1
Monoctonus crepidis	Uroleucon sp.	Uroleucon sp. (2)	June	1	2	19	1	1
Praon barbatum		Acyrthosiphon pisum (2)	June, September	2	2	2	1	1
Praon sp.		Uroleucon sp. (1)	July	1	1	7	NA	1
Praon uroleucon		Uroleucon sp. (2)	June, July	2	2	2	1	1
Praon volucre		Uroleucon sp. (2)	June, July	2	3	9	23	2
Praon yomenae		Uroleucon sp. (2)	June	1	2	4	4	1
Trioxys auctus	Sitobion avenae	Sitobion avenae (1)	July	1	1	1	1	1

## Sheet: host_range_after_ML_tree
Parasitoids species	Presence in the agroecosystem	Month(s) of presence	Number of samples	Number of individuals	Potential host range	Realized host range
Adialytus salicaphis	June, July	2	2	36	4	2
Aphidius absinthii	June	1	1	1	2	1
Aphidius avenae	April to July	4	16	50	9	4
Aphidius eadyi	Avril	1	1	1	1	1
Aphidius ervi	April to June, September, October	5	12	40	17	5
Aphidius funebris	June, July, September, October	4	15	36	2	3
Aphidius matricariae1	May to July, October	4	11	23	13	5
Aphidius matricariae2	May to July, October	4	11	23	13	2
Aphidius matricariae3	May to July, October	4	11	23	13	1
Aphidius rhopalosiphii	April, May	2	3	5	2	2
Aphidius rosae	June	1	1	1	2	1
Aphidius salicis	June	1	2	22	5	2
Aphidius sonchi	Mai, June	2	6	92	3	6
Aphidius urticae	April	1	1	1	8	1
Binodoxys acalephae	June, July	2	5	20	3	4
Binodoxys angelicae	May at July, September	4	18	75	12	5
Binodoxys centaurea	June, July	2	7	36	4	3
Diaeretiella rapae1	May, June, September, October	4	19	320	21	4
Diaeretiella rapae2	May, June, September, October	4	19	320	21	1
Ephedrus nacheri	September, October	2	3	6	3	1
Ephedrus niger	July	1	1	2	4	1
Ephedrus plagiator1	June, October, November	3	10	24	18	2
Ephedrus plagiator2	June, October, November	3	10	24	18	2
Lysiphlebus confusus	June	1	1	5	7	1
Lysiphlebus fabarum1	June, July, October	3	23	696	13	4
Lysiphlebus fabarum2	June, July, October	3	23	696	13	3
Lysiphlebus testraceïpes	June	1	1	19	5	1
Monoctonus crepidis	June	1	2	19	1	1
Praon barbatum	June, September	2	2	2	1	1
Praon sp.	July	1	1	7	NA	1
Praon uroleucon	June, July	2	2	2	1	1
Praon volucre	June, July	2	3	9	23	2
Praon yomenae	June	1	2	4	4	1
Trioxys auctus	July	1	1	1	1	1
